# Supplementary material for: Adsorption Kinetic Model Predicts and Improves Reliability of Electrochemical Serotonin Detection
Source: MDPI journal article supplement (doi:10.3390/mps6010006), 2023-01-09
Supplement: s1 [file s1]

Supplementary

# Adsorption Kinetic Model Predicts and Improves Reliability of Electrochemical Serotonin Detection

Ashley Augustiny Chapin, Jinjing Han and Reza Ghodssi

## Derivation of Langmuir Isotherm Equation

This section describes the step-by-step derivation of the Langmuir isotherm equation that describes binding between 5-HT and the electrode (ELD). The terms here are specified for this reaction, but this process can be generalized for any binding reaction.

The 5-HT binding reaction with ELD states:

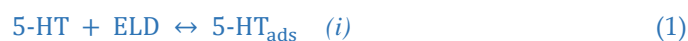

where 5-HT is the concentration of free 5-HT in solution (M) and ELD is the number of available binding sites on the electrode surface (#mol sites). The forward and reverse reactions rates are  $k_{\text{on}}$  ( $\text{M}^{-1} \text{s}^{-1}$ ) and  $k_{\text{off}}$  ( $\text{s}^{-1}$ ), respectively. The rate of production of 5-HT<sub>ads</sub> and ELD binding sites can be described by the differential equations:

$$\frac{d5\text{-HT}_{\text{ads}}}{dt} = k_{\text{on}} \cdot [5\text{-HT}] \cdot \text{ELD} - k_{\text{off}} \cdot 5\text{-HT}_{\text{ads}} \quad (ii)$$

$$\frac{d\text{ELD}}{dt} = k_{\text{off}} \cdot 5\text{-HT}_{\text{ads}} - k_{\text{on}} \cdot [5\text{-HT}] \cdot \text{ELD} \quad (iii)$$

Derivation of the Langmuir isotherm requires the assumption that the binding reaction proceeds to equilibrium. At equilibrium, the rate of product formation = 0, such that:

$$k_{\text{on}} [5\text{-HT}] \cdot \text{ELD}_{\text{eq}} = k_{\text{off}} \cdot 5\text{-HT}_{\text{ads,eq}} \quad (iv)$$

where  $\text{ELD}_{\text{eq}}$  and  $5\text{-HT}_{\text{ads,eq}}$  are the number of available electrode binding sites (mol) and number of adsorbed 5-HT (mol) at equilibrium, respectively. The dissociation constant,  $K_D$  is described as:

$$K_D = \frac{k_{\text{off}}}{k_{\text{on}}} \quad (v)$$

Plugging this into equation (iv), we obtain:

$$K_D = \frac{[5\text{-HT}] \cdot \text{ELD}_{\text{eq}}}{5\text{-HT}_{\text{ads,eq}}} \quad (vi)$$

$\text{ELD}_{\text{eq}}$  can be expressed as:

$$\text{ELD}_{\text{eq}} = \text{ELD}_{\text{tot}} - 5\text{-HT}_{\text{ads,eq}} \quad (vii)$$

where  $\text{ELD}_{\text{tot}}$  is the total number of available binding sites on a fresh electrode, which can be experimentally estimated. Plugging (vii) into (vi) and solving for  $5\text{-HT}_{\text{ads,eq}}$  yields the Langmuir isotherm for this binding reaction:

$$5\text{-HT}_{\text{ads,eq}} = \frac{[5\text{-HT}] \cdot \text{ELD}_{\text{tot}}}{K_D + [5\text{-HT}]} \quad (viii)$$

It should be noted that this equation assumes excess [5-HT] in solution. This equation can then be used to experimentally determine  $K_D$  and  $\text{ELD}_{\text{tot}}$  for the tested electrodes. A

sample Langmuir isotherm is shown in Figure S1, which is fit to sample experimental data.

### Experimental data acquisition

Here, data is acquired by electrochemically measuring 5-HT at increasing concentrations. When using CV, Ipa signal is obtained, which should scale with concentration up to a saturation point. Ipa is converted to 5-HT<sub>ads,eq</sub> by equation (6) in the main text, and because these measurements are each made at equilibrium (15 h allowed for binding to equilibrate per data point), we can label the y axis as 5-HT<sub>ads,eq</sub>. This allows the data to be fit with the Langmuir isotherm equation (viii) to solve for the remaining variables.

### Calculating K<sub>D</sub> and ELD<sub>tot</sub>

The plateau value is equal to ELD<sub>tot</sub>, as the maximum number of binding sites for 5-HT on the electrode surface. K<sub>D</sub> can be calculated as the [5-HT] at which the graph reaches half of the plateau value.

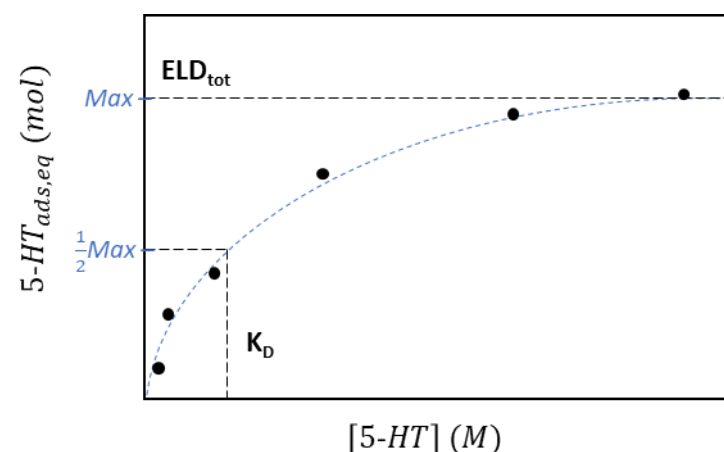

**Figure S1.** Sample Langmuir isotherm. Black dots show experimental data plotted as 5-HT<sub>ads,eq</sub> against [5-HT], and the dashed blue line denotes the data fit with equation (viii). ELD<sub>tot</sub> is calculated as equal to 5-HT<sub>ads,eq</sub> at the maximum signal, and K<sub>D</sub> is calculated as equal to [5-HT] at half the maximum signal.

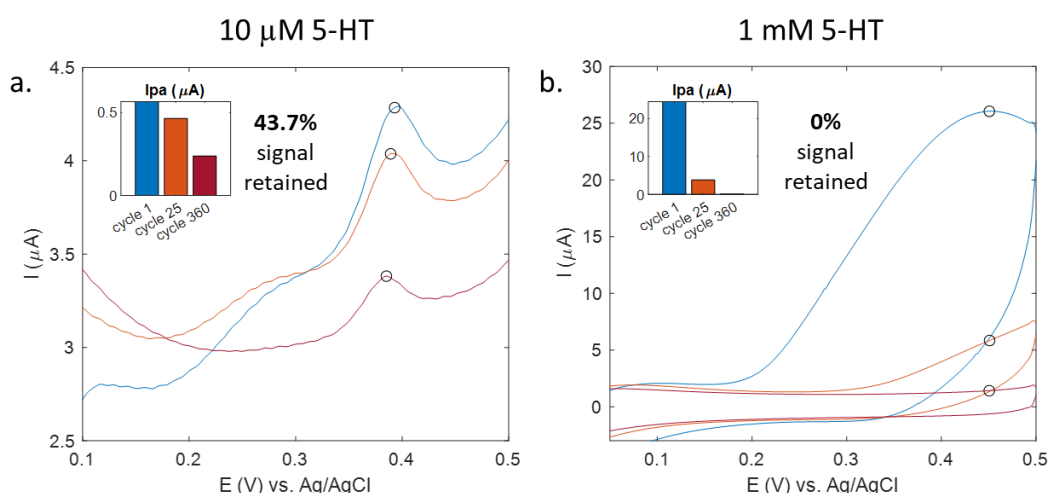

**Figure S2.** Fouling of Au-CNT electrodes in (a) 10 μM and (b) 1 mM 5-HT, showing CV cycles 1, 25, and 360. ( $t_{acc} = 0$  min, scan rate = 50 mV/s). Insets: Ipa measured at each cycle. Percent of signal retained after 360 cycles is labeled. Rate of 5-HT fouling increases with increasing 5-HT concentration.

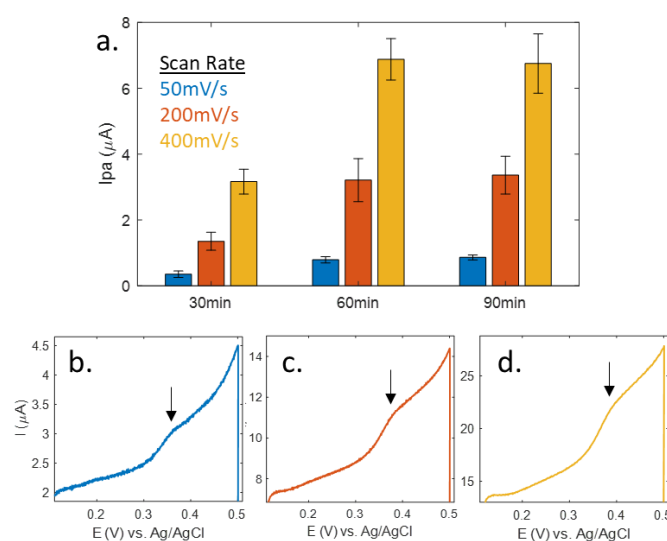

**Figure S3.** (a) Effect of scan rate and  $t_{acc}$  on CV detection of 100 nM 5-HT. Error bars denote standard deviation ( $n = 2$  electrodes). (b-d) Representative CV curves from (a) using a  $t_{acc}$  of 30 min and scan rate of (b) 50, (c) 200, and (d) 400 mV/s. 5-HT peak denoted with black arrow.

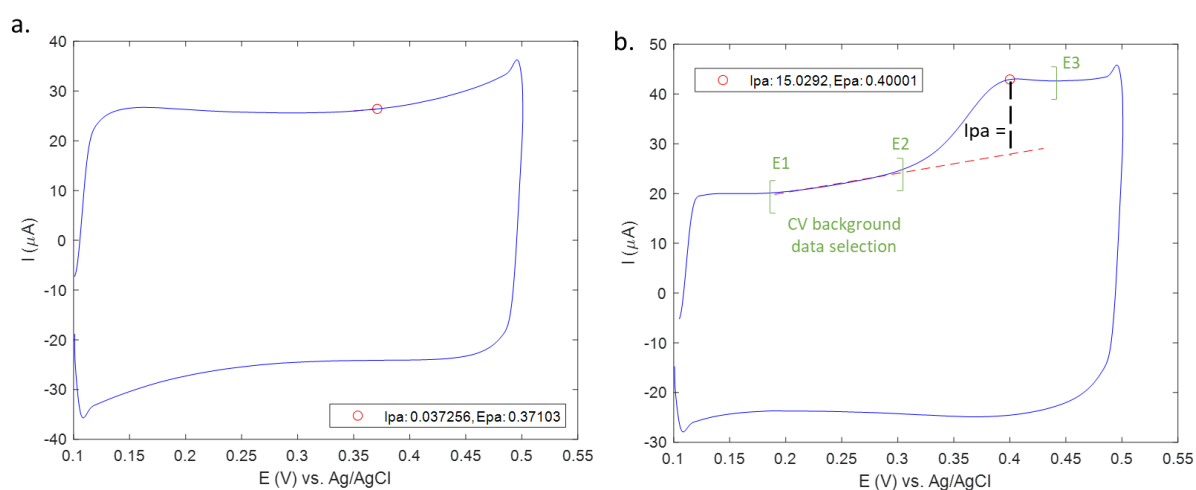

**Figure S4.**  $I_{pa}$  measurement by subtraction of linear baseline fit (red dashed line). (a) PBS measurement, no CV peak. (b) 10  $\mu M$  5-HT  $I_{pa}$  measurement. Green brackets denote data points before the CV curve, selected for linear regression, which is extended to a point after the peak potential. The  $I_{pa}$  value is calculated by vertical subtraction of the background fit line from the CV curve, and selecting the maximum difference.

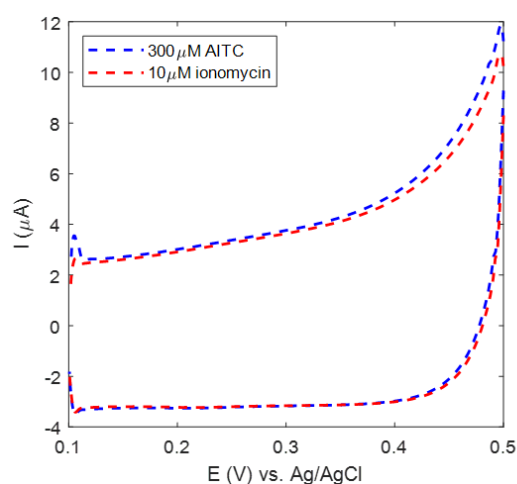

**Figure S5.** Negative control CV measurements of AITC and ionomycin, showing no peak response.

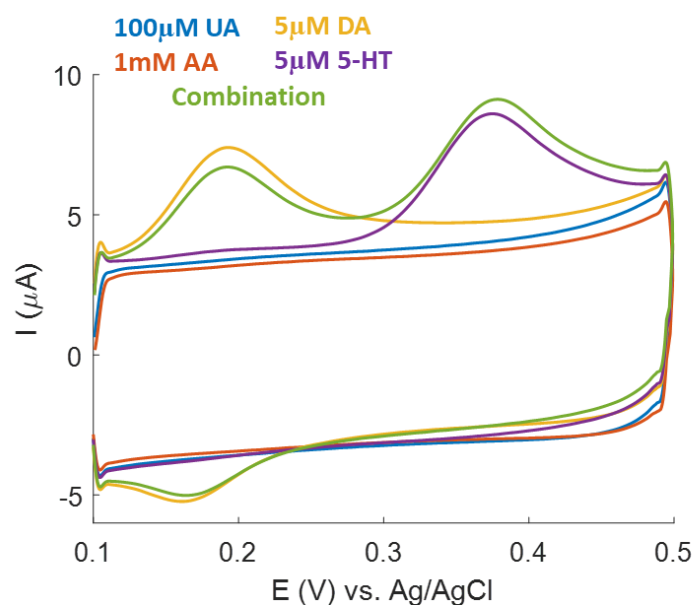

**Figure S6.** Selectivity of Au-CNT electrode in the presence of 100  $\mu\text{M}$  uric acid (UA), 1 mM ascorbic acid (AA), 5  $\mu\text{M}$  dopamine (DA), and 5  $\mu\text{M}$  5-HT in PBS. The black curve shows the combination of all chemicals. Both UA and AA show no current response within the working potential range. DA oxidation is measured as 3.2  $\mu\text{A}$  at 0.23 V, while 5-HT oxidation is measured as 3.6  $\mu\text{A}$  at 0.42 V, indicating significant separation of their peaks ( $t_{\text{acc}} = 10 \text{ min}$ ,  $n=1$ ).

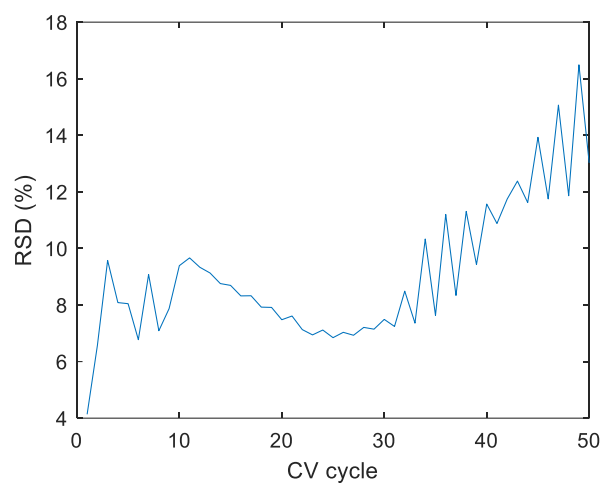

**Figure S7.** Electrode variability, measured as repeatability standard deviation (RSD%), over 50 cycles of fouling, evaluated from Figure 5b. RSD is calculated as standard deviation / mean  $\times$  100% ( $n = 4$  electrodes).
